# Supplementary material for: The impact of tetrahydrocannabinol on central pain modulation in chronic pain: a randomized clinical comparative study of offset analgesia and conditioned pain modulation in fibromyalgia
Source: Springer Nature journal article supplement (doi:10.1186/s42238-025-00348-x), 2025-11-06

**A****Baseline OA magnitude**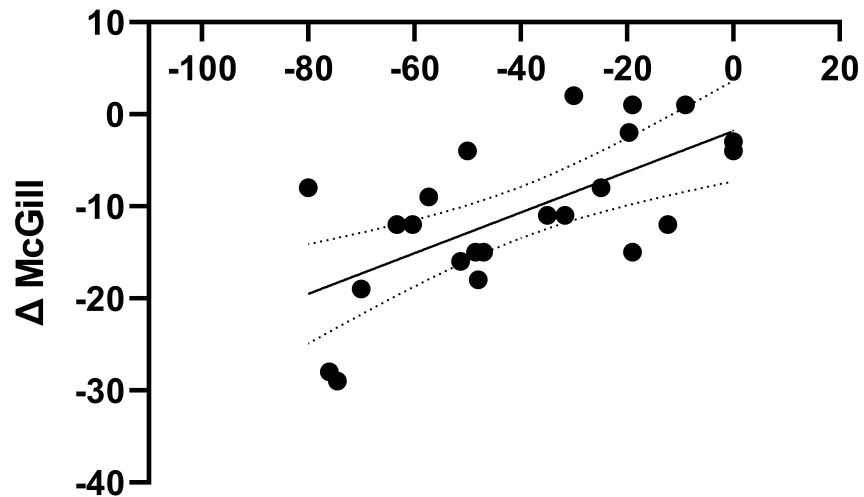**B****Baseline OA index**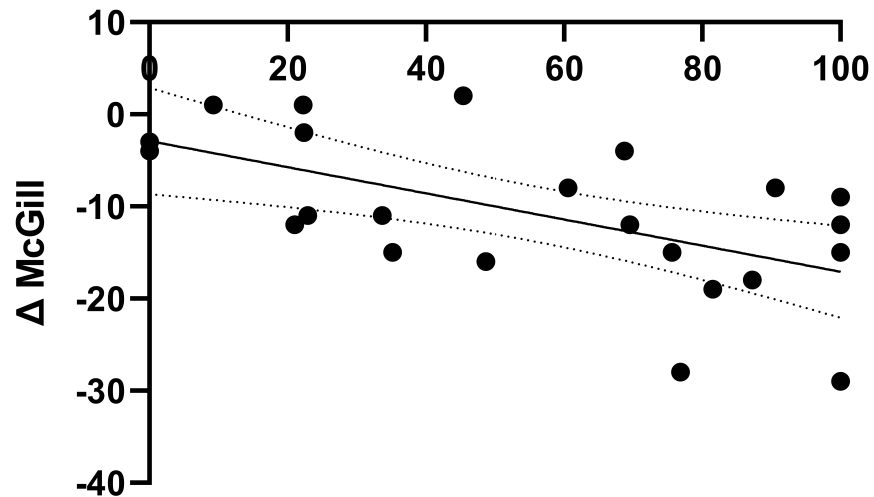

Supplement: MOESM7 [file 42238_2025_348_MOESM7_ESM-1.pdf]
